# Supplementary figures and images for: Immunogenicity Rates after SARS-CoV-2 Three-Dose Vaccination in Patients under Dialysis: A Systematic Review and Meta-Analysis
Source: MDPI journal article supplement (doi:10.3390/vaccines10122070), 2022-12-02

NOTE: Weights are from random effects analysis

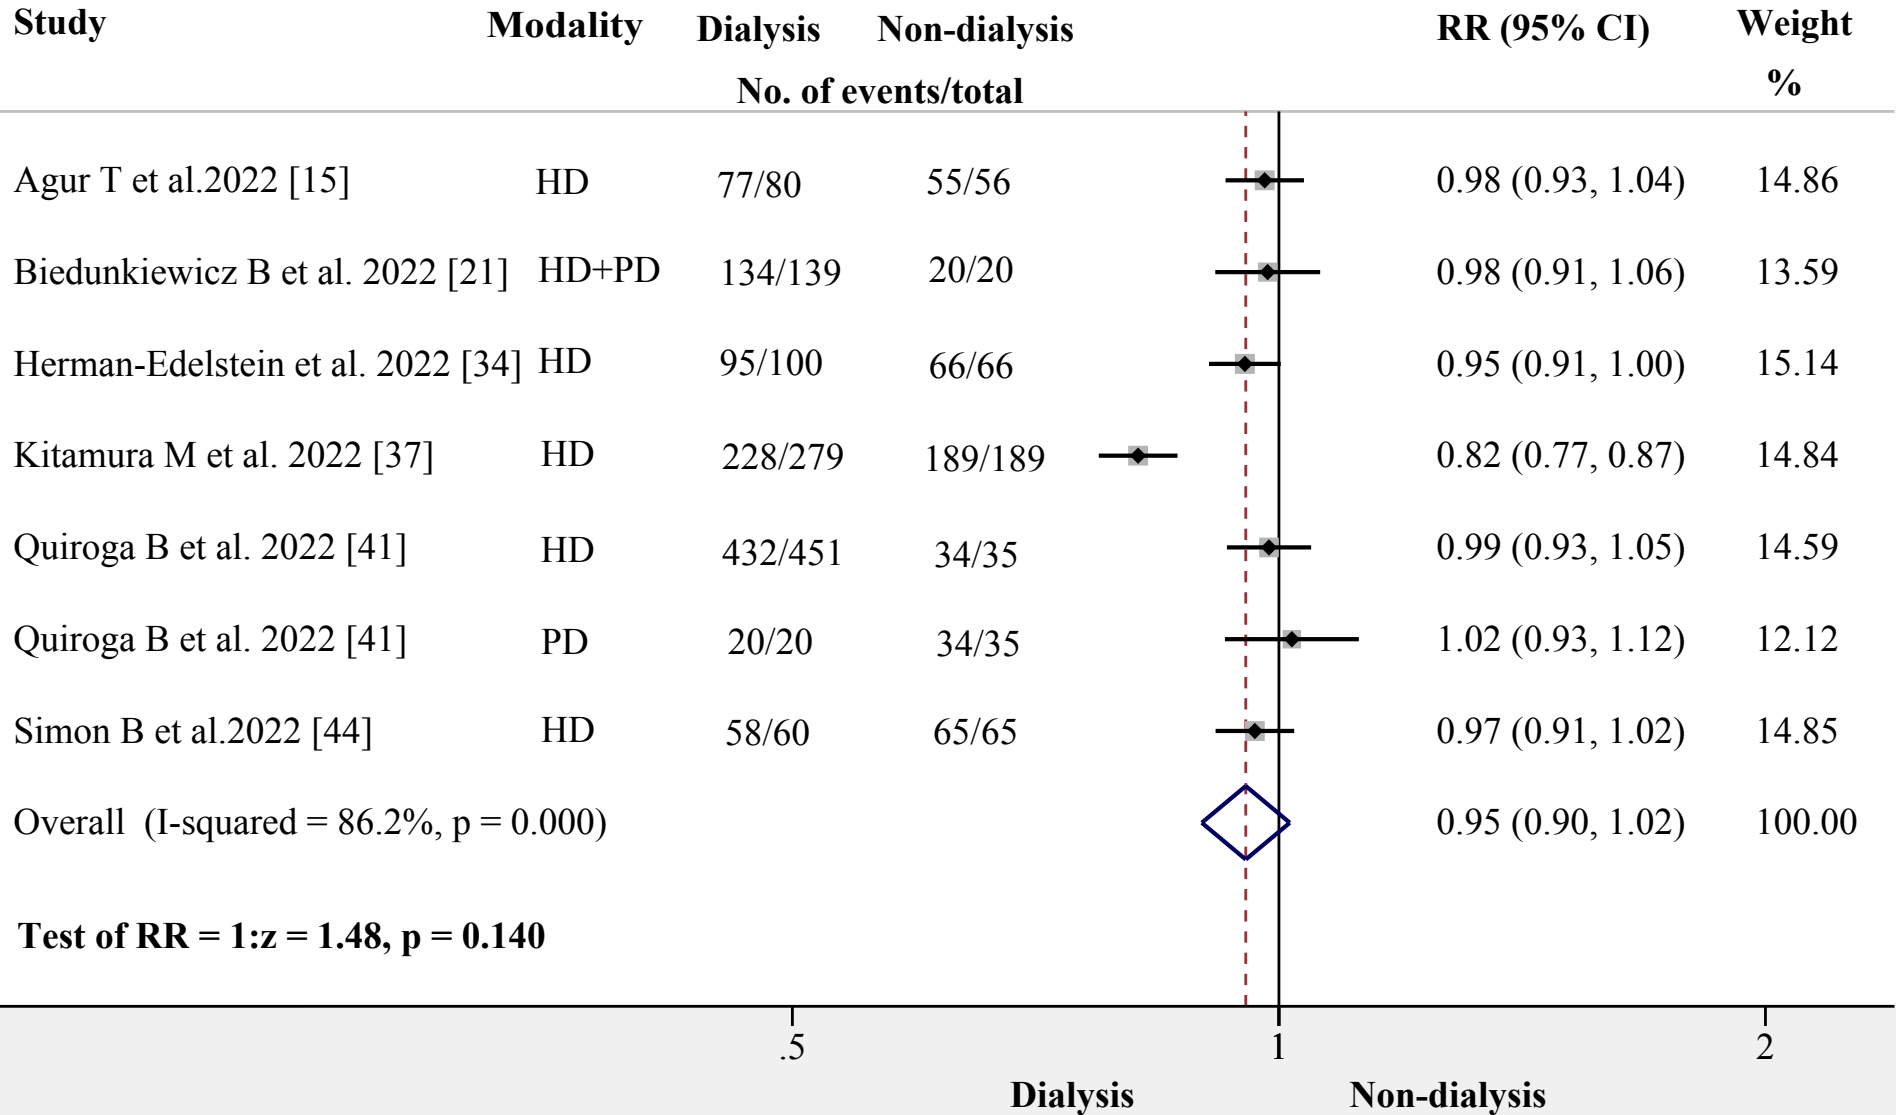

Supplement: s1 [file s1]

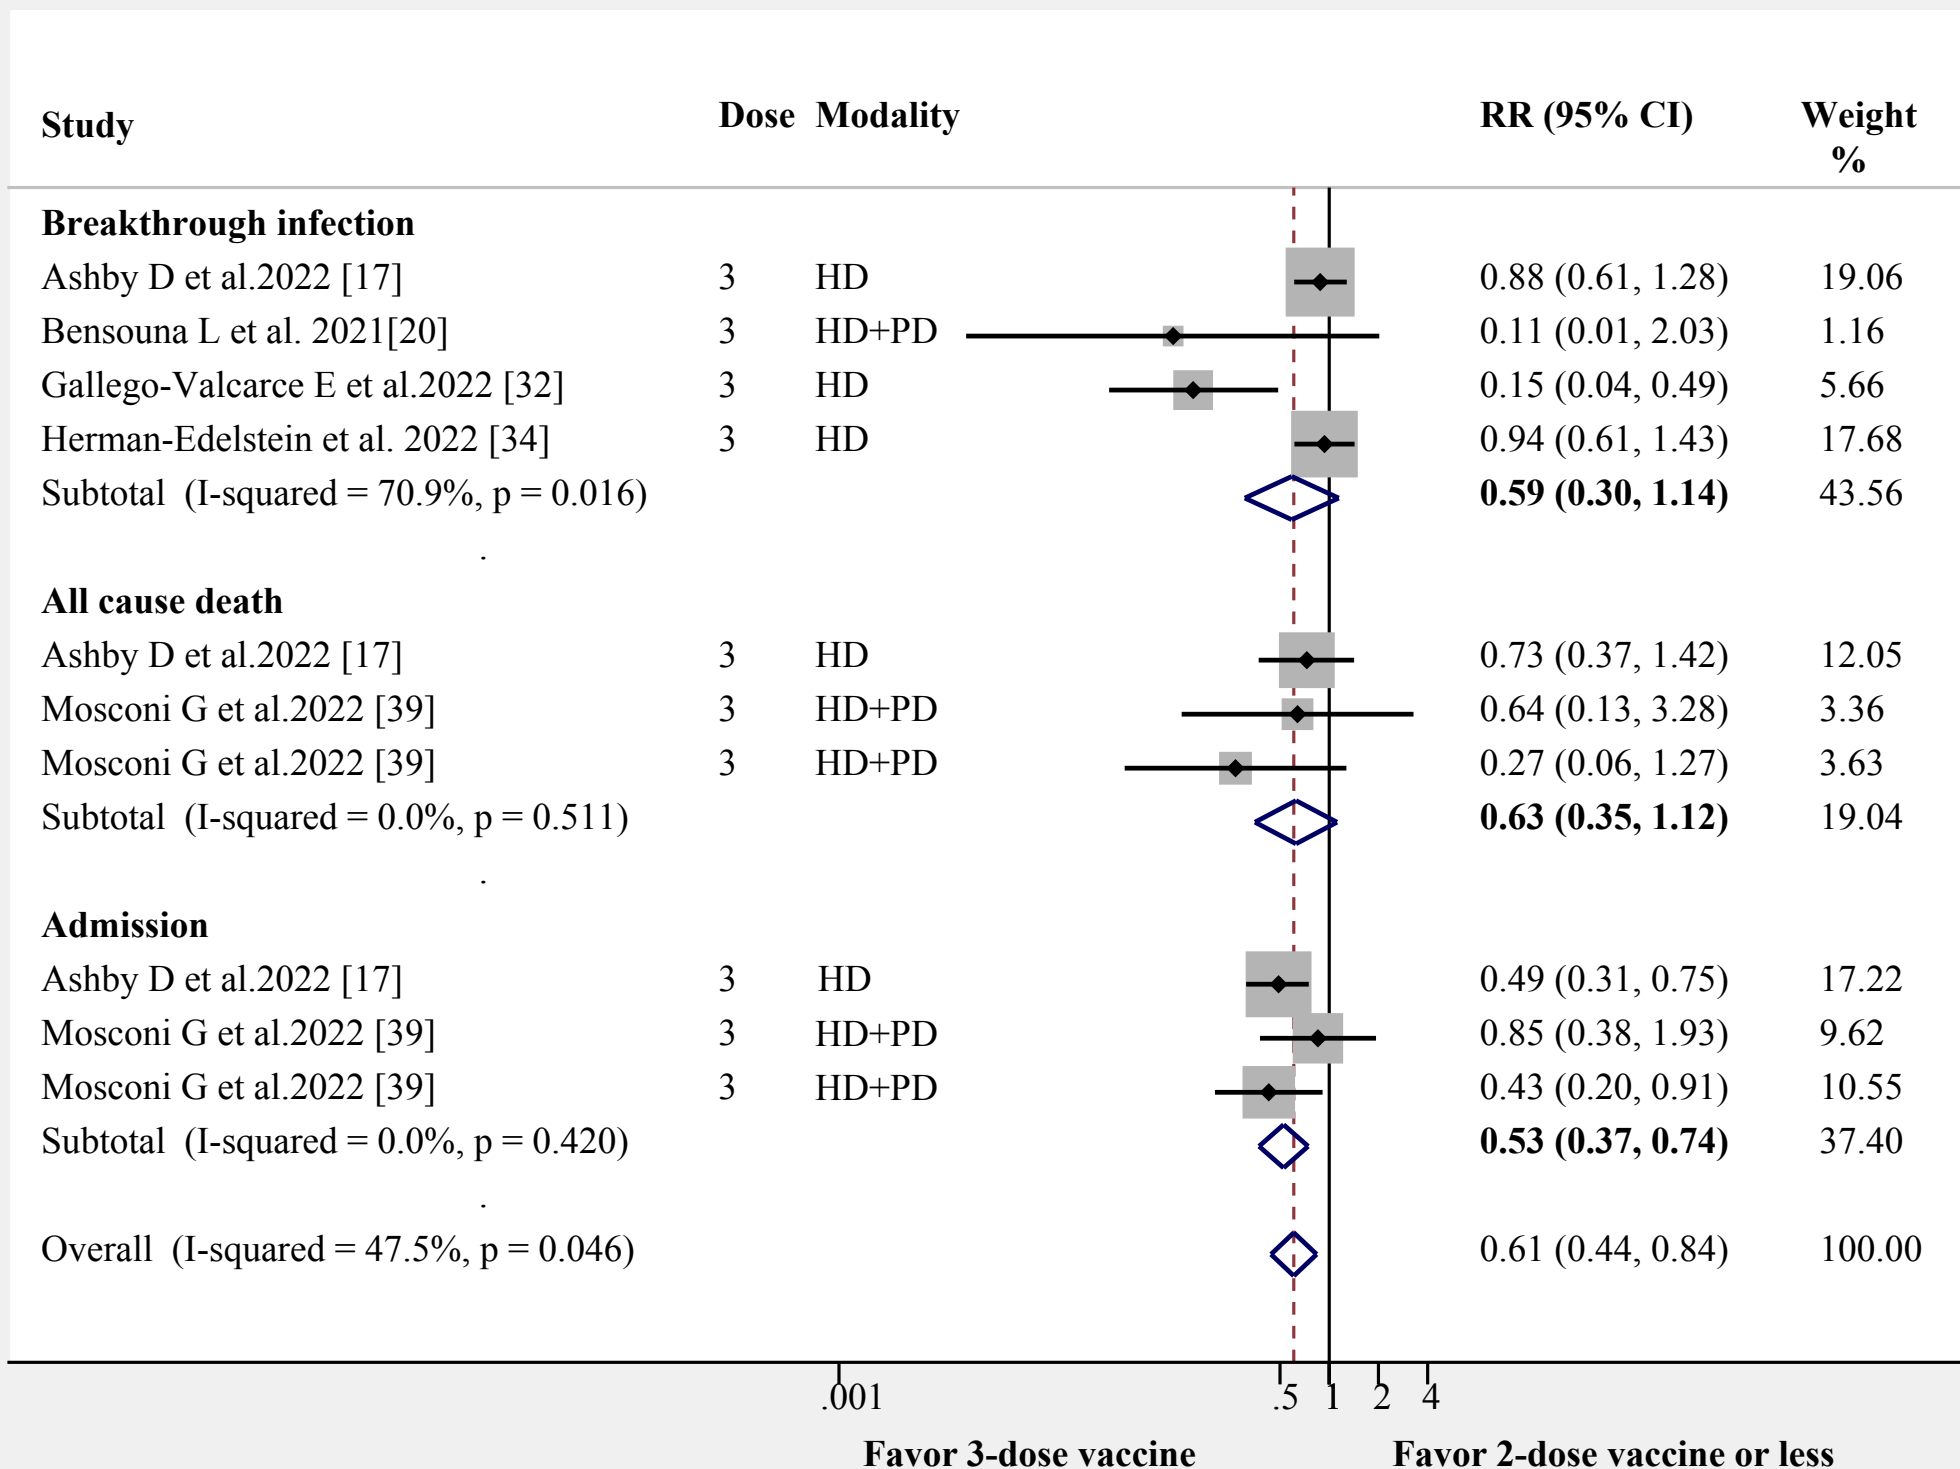

Supplement: s1 [file s1]

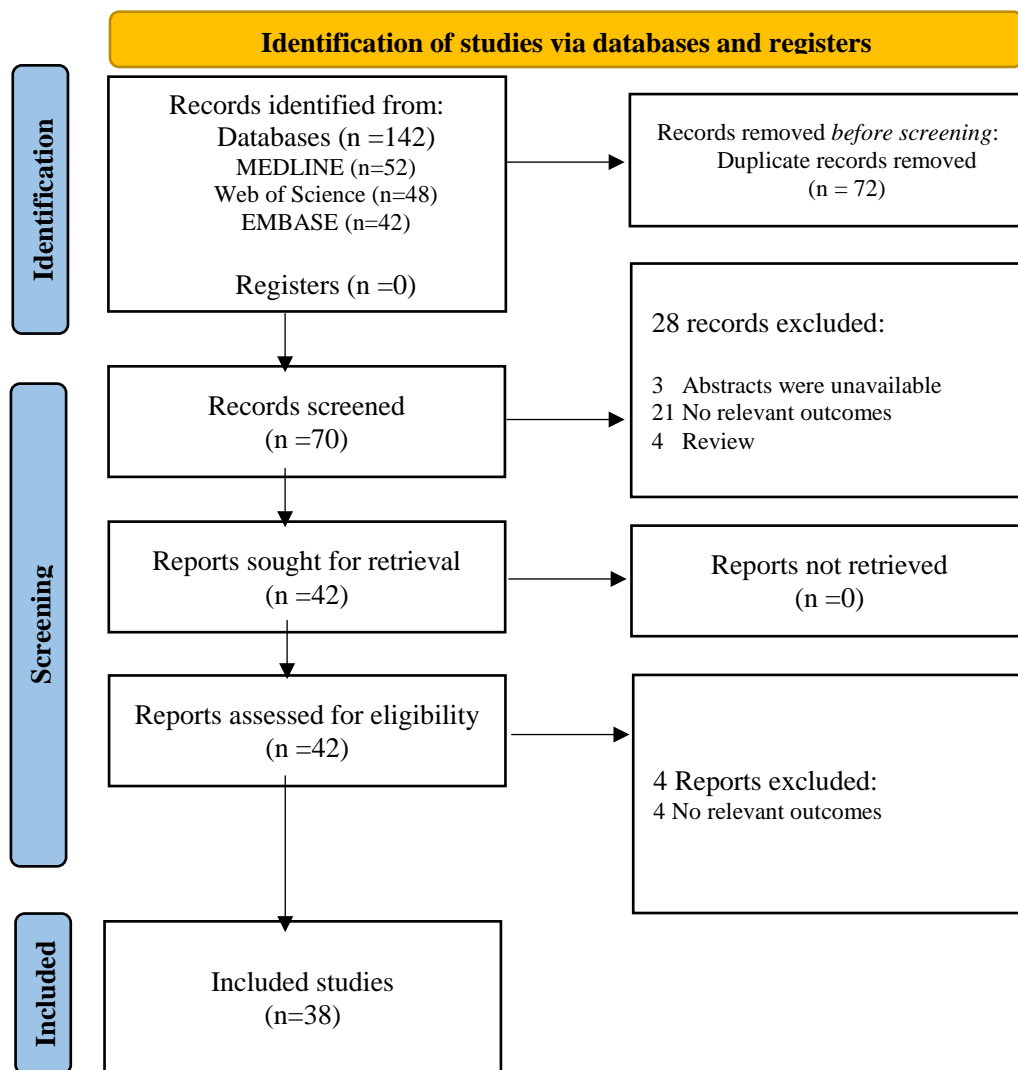

**Figure S1 PRISMA 2020 flow diagram**

Supplement: s1 [file s1]

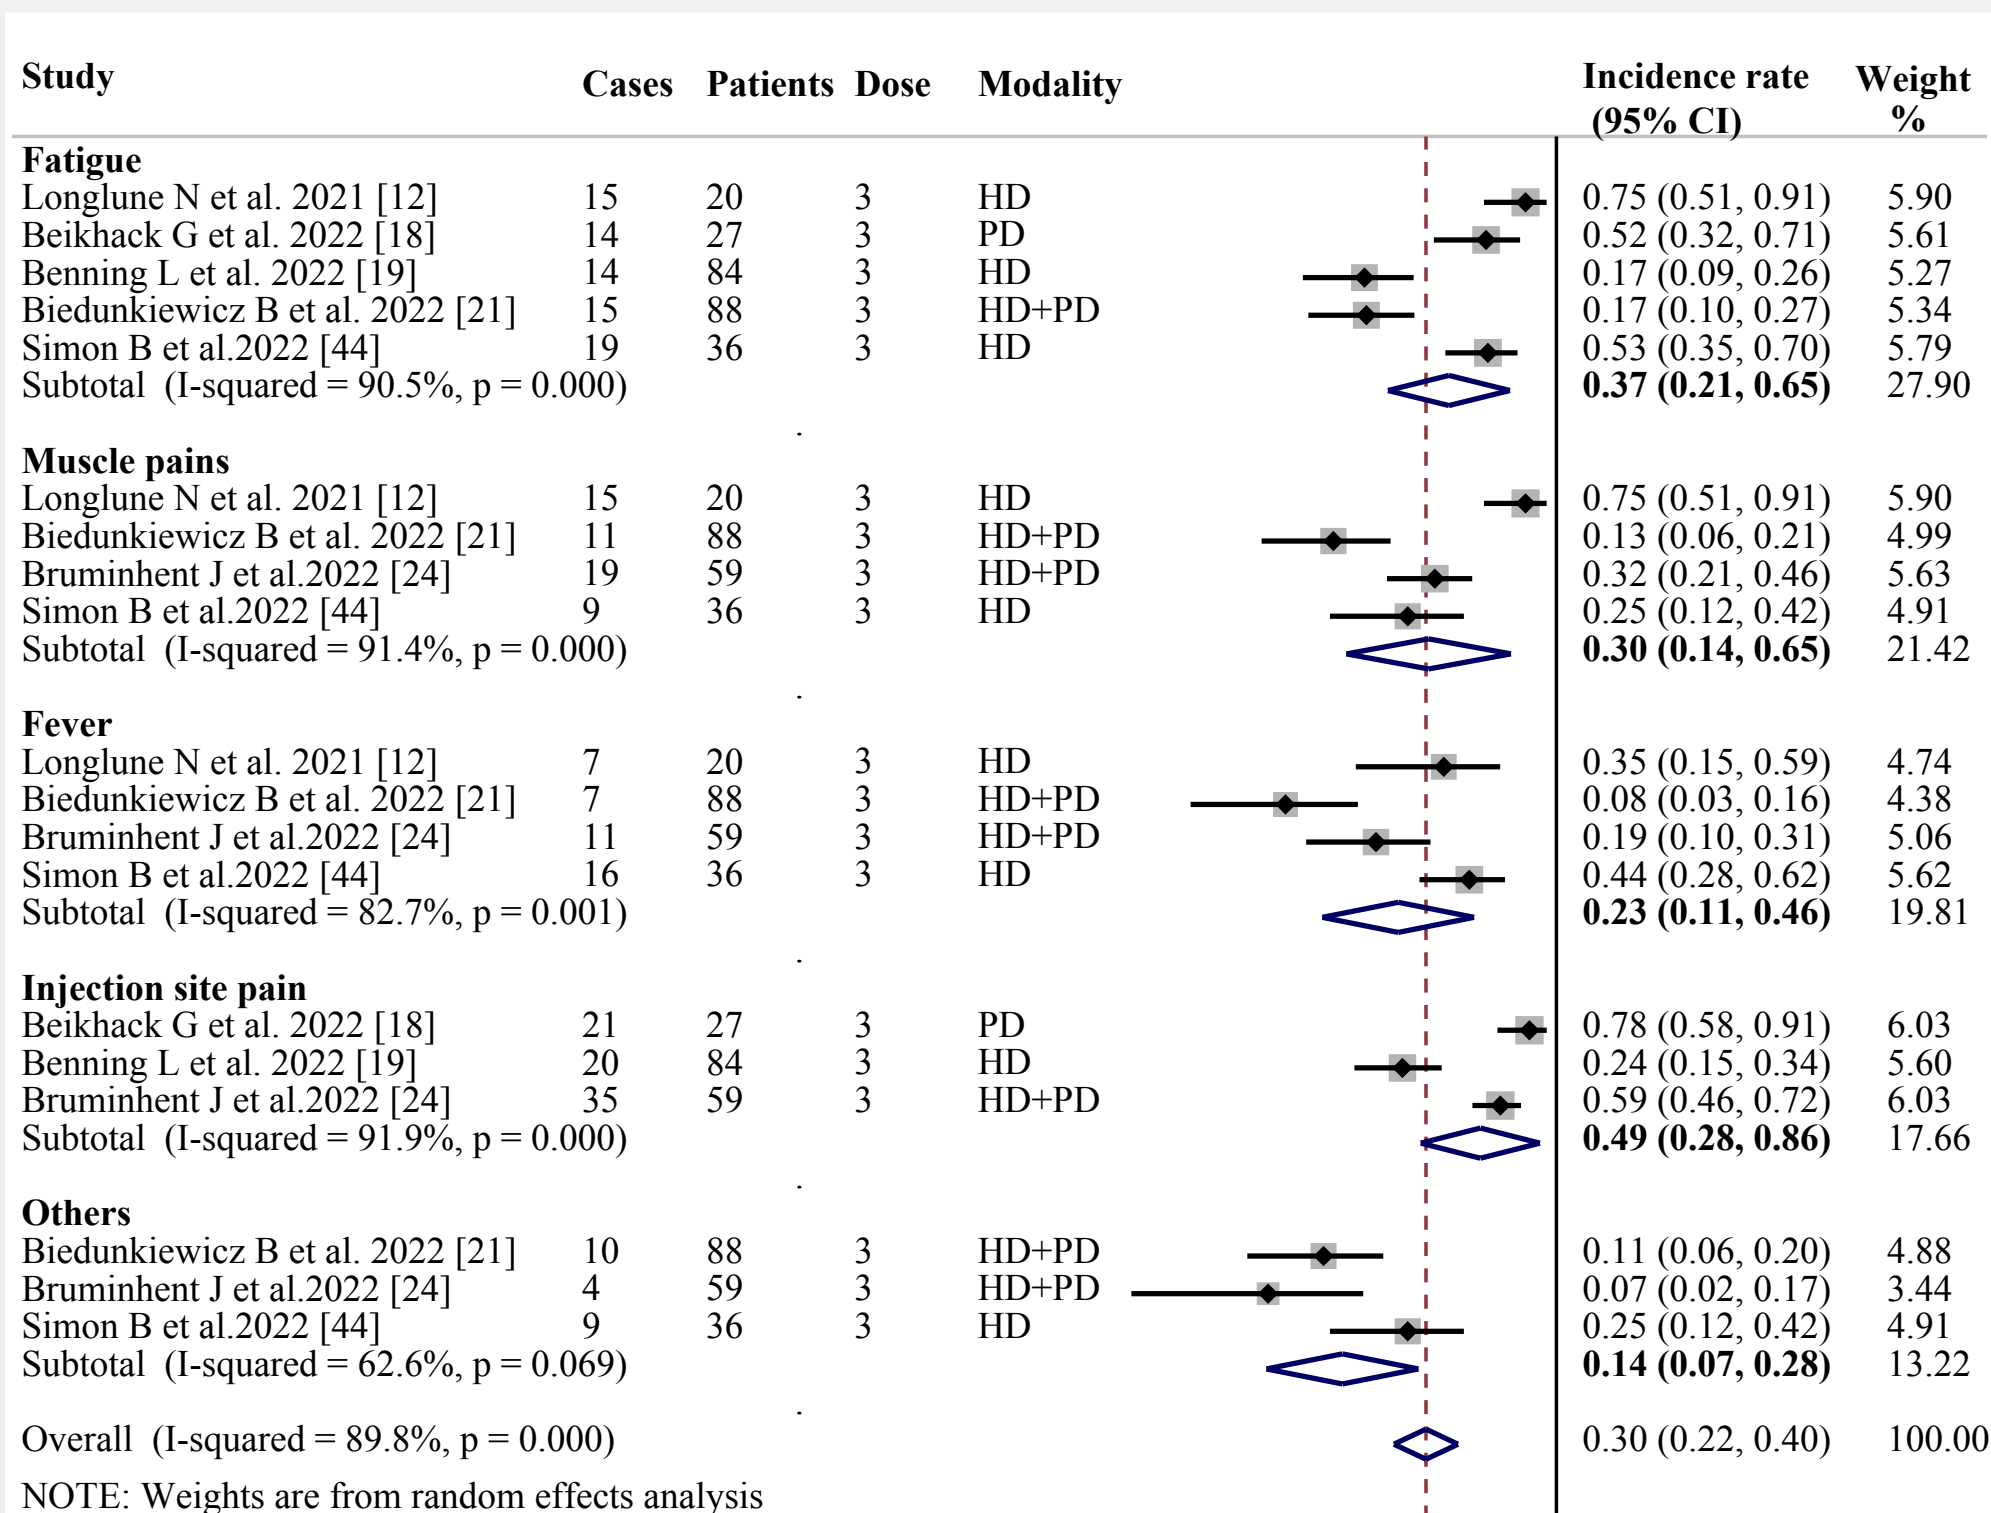

.01 .4 .6 .81

Incidence rate (95%CI)

Supplement: s1 [file s1]
